# Supplementary material for: Novel targets, treatments, and advanced models for intracerebral haemorrhage
Source: PubMed Central journal article supplement (PMC8850756; doi:10.1016/j.ebiom.2022.103880), 2022-02-12
Supplement: mmc1.pdf [file mmc1.pdf]

Supplementary Material for

**Novel targets, treatments, and advanced models for intracerebral haemorrhage**

Marietta Zille<sup>1</sup>, Tracy D. Farr<sup>2</sup>, Richard F. Keep<sup>3</sup>, Christine Römer<sup>4</sup>, Guohua Xi<sup>3</sup>, Johannes Boltze<sup>5</sup>

<sup>1</sup> University of Vienna, Department of Pharmaceutical Sciences, Division of Pharmacology and Toxicology, UZA II, Althanstr. 14, 1090 Vienna, Austria

<sup>2</sup> University of Nottingham, School of Life Sciences, Physiology, Pharmacology, and Neuroscience Division, Medical School, Nottingham NG7 2UH, UK

<sup>3</sup> University of Michigan, Department of Neurosurgery, Ann Arbor, MI 48109-2200, USA

<sup>4</sup> Max Delbrück Center for Molecular Medicine in the Helmholtz Association, The Berlin Institute for Medical Systems Biology, 13125 Berlin, Germany

<sup>5</sup> The University of Warwick, School of Life Sciences, Gibbet Hill Campus, Coventry CV4 7AL, UK

Correspondence to:

Marietta Zille, University of Vienna, Department of Pharmaceutical Sciences, Division of Pharmacology and Toxicology, UZA II, Althanstr. 14, 1090 Vienna, Austria, email: marietta.zille@univie.ac.at

Or

Johannes Boltze, University of Warwick, School of Life Sciences, Gibbet Hill Road, Coventry CV4 7AL, United Kingdom, email: johannes.boltze@warwick.ac.uk

**Supplementary:**

**Supplementary Table. Overview of interventional clinical trials for spontaneous ICH after 2010.** GOSE, Glasgow Outcome Scale Extended; MMP, matrix metalloproteinase; mRS, modified Rankin Scale; NIHSS, National Institute Health Stroke Scale; OR, odds ratio; rt-PA, recombinant tissue plasminogen activator.

**Supplementary Table. Overview of interventional clinical trials for spontaneous ICH after 2010.** GOSE, Glasgow Outcome Scale Extended; MMP, matrix metalloproteinase; mRS, modified Rankin Scale; NIHSS, National Institute Health Stroke Scale; OR, odds ratio; rt-PA, recombinant tissue plasminogen activator.

| Study title (as listed in clinicaltrials.gov)                                                                           | Identifier                                       | Phase | Intervention                                                                | Target                                     | Outcome (control vs. intervention)                                                                                                                                                                                                                            |
|-------------------------------------------------------------------------------------------------------------------------|--------------------------------------------------|-------|-----------------------------------------------------------------------------|--------------------------------------------|---------------------------------------------------------------------------------------------------------------------------------------------------------------------------------------------------------------------------------------------------------------|
| Rivaroxaban Versus Dabigatran or Warfarin in Real-World Studies of Stroke Prevention in Atrial Fibrillation             | Systematic review and meta-analysis (17 studies) | N/A   | Drug: rivaroxaban, dabigatran, warfarin                                     | Antiplatelet/ anticoagulation              | Rivaroxaban similar risk of stroke/thromboembolism vs. dabigatran (hazard ratio 1.02) and reduced vs. warfarin (hazard ratio 0.75), increased major bleeding risk vs. dabigatran (hazard ratio 1.38) but similar to warfarin (hazard ratio 0.99) <sup>1</sup> |
| Apixaban After Anticoagulation-associated Intracerebral Haemorrhage in Patients With Atrial Fibrillation (APACHE-AF)    | NCT02565693                                      | 2     | Drug: apixaban                                                              | Antiplatelet/ anticoagulation              | No difference in non-fatal stroke or vascular death (24% vs. 26%) and serious adverse events (57% vs. 58%) over median follow-up of 1.9 years <sup>2</sup>                                                                                                    |
| NOACs for Stroke Prevention in Patients With Atrial Fibrillation and Previous ICH (NASPAF-ICH)                          | NCT02998905                                      | 2     | Drug: non-vitamin K antagonist oral anticoagulants vs. acetylsalicylic acid | Antiplatelet/ anticoagulation              | Completed, pending results                                                                                                                                                                                                                                    |
| Study of Antithrombotic Treatment After IntraCerebral Haemorrhage (STATICH)                                             | NCT03186729                                      | 4     | Drug: antithrombotic agent                                                  | Antiplatelet/ anticoagulation              | Recruiting                                                                                                                                                                                                                                                    |
| Anticoagulation in ICH Survivors for Stroke Prevention and Recovery (ASPIRE)                                            | NCT03907046                                      | 3     | Drug: apixaban, acetylsalicylic acid                                        | Antiplatelet/ anticoagulation              | Recruiting                                                                                                                                                                                                                                                    |
| PREvention of STroke in Intracerebral haemorrhage Survivors With Atrial Fibrillation (PRESTIGE-AF)                      | NCT03996772                                      | 3     | Drug: apixaban, dabigatran, edoxaban, rivaroxaban                           | Antiplatelet/ anticoagulation              | Recruiting                                                                                                                                                                                                                                                    |
| Antiplatelet Secondary Prevention International Randomised Trial After INtracerebral haemorrhage (ASPIRING)-Pilot Phase | NCT04522102                                      | 3     | Drug: start antiplatelet monotherapy                                        | Antiplatelet/ anticoagulation              | Recruiting                                                                                                                                                                                                                                                    |
| Avoiding Anticoagulation After IntraCerebral Haemorrhage (A3ICH)                                                        | NCT03243175                                      | 3     | Drug: apixaban, device: left atrial appendage closure                       | Antiplatelet/ anticoagulation              | Recruiting                                                                                                                                                                                                                                                    |
| REstart or STop Antithrombotic Randomised Trial in France (RESTART-Fr)                                                  | NCT02966119                                      | 3     | Drug: clopidogrel or acetylsalicylic acid and/or Dipyridamole               | Antiplatelet/ anticoagulation              | Recruiting                                                                                                                                                                                                                                                    |
| Early-Start Antiplatelet Treatment After Neurosurgery in Patients With Spontaneous Intracerebral Hemorrhage             | NCT04820972                                      | N/A   | Drug: antiplatelet agents                                                   | Antiplatelet/ anticoagulation              | Recruiting                                                                                                                                                                                                                                                    |
| Improving Platelet Activity for Cerebral Hemorrhage Treatment - DDAVP Proof of Concept (IMPACT)                         | NCT00961532                                      | 2     | Drug: desmopressin                                                          | Antiplatelet reversal, haematoma expansion | Improved platelet activity, modest changes in haematoma growth <sup>3</sup>                                                                                                                                                                                   |
| Desmopressin for Reversal of Antiplatelet Drugs in Stroke Due to Haemorrhage (DASH)                                     | NCT03696121                                      | 2     | Drug: desmopressin                                                          | Antiplatelet reversal,                     | Recruiting                                                                                                                                                                                                                                                    |

| Study title (as listed in clinicaltrials.gov)                                                                        | Identifier  | Phase              | Intervention                                                                                                                                     | Target              | Outcome (control vs. intervention)                                                                                                                                           |
|----------------------------------------------------------------------------------------------------------------------|-------------|--------------------|--------------------------------------------------------------------------------------------------------------------------------------------------|---------------------|------------------------------------------------------------------------------------------------------------------------------------------------------------------------------|
|                                                                                                                      |             |                    |                                                                                                                                                  | haematoma expansion |                                                                                                                                                                              |
| Antihypertensive Treatment of Acute Cerebral Hemorrhage-II (ATACH-II)                                                | NCT01176565 | 3                  | Drug: intravenous nicardipine hydrochloride                                                                                                      | Haematoma expansion | Reduced rate of patients with haematoma expansion (24% vs. 19%), no difference in functional outcome mRS 0-3 (62% vs. 61%), or mortality (7% vs. 7%) at 90 days <sup>4</sup> |
| The Second Intensive Blood Pressure Reduction in Acute Cerebral Haemorrhage Trial (INTERACT2)                        | NCT00716079 | 3                  | Other: blood pressure management policies (routinely available drugs for blood pressure lowering)                                                | Haematoma expansion | Reduced haematoma growth by 4.5% volume, improved functional outcome mRS 0-3 (61% vs. 64%), no difference in mortality (12% vs. 12%) <sup>5</sup>                            |
| The Third, Intensive Care Bundle With Blood Pressure Reduction in Acute Cerebral Hemorrhage Trial (INTERACT3)        | NCT03209258 | 4 phases / 3 steps | Other: care bundle of active management (intensive blood pressure lowering, glycemic control, treatment of pyrexia, reversal of anticoagulation) | Haematoma expansion | Recruiting                                                                                                                                                                   |
| Intensive Ambulance-delivered Blood Pressure Reduction in Hyper-Acute Stroke Trial (INTERACT4)                       | NCT03790800 | 3                  | Drug: urapidil                                                                                                                                   | Haematoma expansion | Recruiting                                                                                                                                                                   |
| Intracerebral Hemorrhage Acutely Decreasing Arterial Pressure Trial (ICH ADAPT)                                      | NCT00963976 | 2                  | Drug: labetalol/ hydralazine/ enalapril                                                                                                          | Haematoma expansion | No difference in haematoma growth (0.71 vs. 0.67), 90-day mRS (4 vs 2.5), or 30-day mortality (11% vs. 18%) <sup>6</sup>                                                     |
| The Intracerebral Hemorrhage Acutely Decreasing Arterial Pressure Trial II (ICH-ADAPT II)                            | NCT02281838 | 2                  | Drug: labetalol/ hydralazine/ enalapril                                                                                                          | Haematoma expansion | Recruiting                                                                                                                                                                   |
| Clevidipine in the Treatment of Patients With Acute Hypertension and Intracerebral Hemorrhage (ACCELERATE)           | NCT00666328 | 3                  | Drug: clevidipine                                                                                                                                | Haematoma expansion | Achieved systolic blood pressure reduction, small haematoma volume change (-2.9%) <sup>7</sup>                                                                               |
| Esmolol for the Treatment of Hypertension After Intracerebral Hemorrhage Study (ETHICHs)                             | NCT03743103 | 4                  | Drug: breviploc (esmolol hydrochloride), nitroprusside                                                                                           | Haematoma expansion | Recruiting                                                                                                                                                                   |
| Triple Therapy Prevention of Recurrent Intracerebral Disease Events Trial (TRIDENT)                                  | NCT02699645 | 3                  | Drug: telmisartan, amlodipine, and indapamide                                                                                                    | Haematoma expansion | Recruiting                                                                                                                                                                   |
| Regulating Blood Pressure During Recovery From Intracerebral Hemorrhage (REDUCE)                                     | NCT04760717 | 2                  | Drug: Spironolactone                                                                                                                             | Haematoma expansion | Recruiting                                                                                                                                                                   |
| Analgesia-first Minimal Sedation for Spontaneous Intracerebral Hemorrhage Early Antihypertensive Treatment (ASSICHH) | NCT03207100 | N/A                | Combination Product: Analgesia-first minimal sedation and antihypertensive treatment                                                             | Haematoma expansion | Completed, pending results                                                                                                                                                   |
| Tranexamic Acid for Acute ICH Growth 3reatment by Spot Sign (TRAIGE)                                                 | NCT02625948 | 2                  | Drug: tranexamic acid                                                                                                                            | Haematoma expansion | Recruiting                                                                                                                                                                   |

| Study title (as listed in clinicaltrials.gov)                                                                                                     | Identifier     | Phase | Intervention                                       | Target               | Outcome (control vs. intervention)                                                                                                                                                        |
|---------------------------------------------------------------------------------------------------------------------------------------------------|----------------|-------|----------------------------------------------------|----------------------|-------------------------------------------------------------------------------------------------------------------------------------------------------------------------------------------|
| Treatment of Intracerebral Hemorrhage in Patients on Non-vitamin K Antagonist (TICH-NOAC)                                                         | NCT02866838    | 2/3   | Drug: tranexamic acid                              | Haematoma expansion  | Completed, pending results                                                                                                                                                                |
| Tranexamic acid for hyperacute primary IntraCerebral Haemorrhage (TICH-2)                                                                         | ISRCTN93732214 | 3     | Drug: tranexamic acid                              | Haematoma expansion  | Reduced rate of patients with haematoma expansion (29% vs. 25%), no difference in favourable functional outcome mRS 0-3 (46% vs. 45%) and mortality (21% vs. 22%) at 90 days <sup>8</sup> |
| Tranexamic Acid for Spontaneous Acute Cerebral Hemorrhage Trial (TRANSACT)                                                                        | NCT03044184    | 3     | Drug: tranexamic acid                              | Haematoma expansion  | Recruiting                                                                                                                                                                                |
| The Spot Sign and Tranexamic Acid On Preventing ICH Growth – AUStralasia Trial (STOP-AUST)                                                        | NCT01702636    | 2     | Drug: tranexamic acid                              | Haematoma expansion  | No difference in the rate of patients with haematoma expansion (52% vs. 44%), favourable functional outcome mRS 0-3 (46% vs. 56%) or death (16% vs. 26%) <sup>9</sup>                     |
| Stopping Haemorrhage With Tranexamic Acid for Hyperacute Onset Presentation Including Mobile Stroke Units (STOP-MSU)                              | NCT03385928    | 2     | Drug: tranexamic acid                              | Haematoma expansion  | Recruiting                                                                                                                                                                                |
| Effectiveness of Intravenous Tranexamic Acid in Primary Cerebral Hemorrhage for Prevention of Hematoma Progression                                | NCT04742205    | 1     | Biological: recombinant activated factor VII       | Haematoma expansion  | Not yet recruiting                                                                                                                                                                        |
| Factor VIIa in Acute Intracerebral Haemorrhage                                                                                                    | NCT00266006    | 2     | Drug: eptacog alfa (activated)                     | Haematoma expansion  | Completed, pending results                                                                                                                                                                |
| Recombinant Factor VIIa (rFVIIa) for Hemorrhagic Stroke Trial (FASTEST)                                                                           | NCT03496883    | 3     | Biological: recombinant activated factor VII       | Haematoma expansion  | Recruiting                                                                                                                                                                                |
| Safety and Preliminary Efficacy of Activated Recombinant Human Factor VII for Preventing Early Hematoma Growth in Acute Intracerebral Haemorrhage | NCT01563445    | 2     | Biological: activated recombinant human factor VII | Haematoma expansion  | Completed, pending results                                                                                                                                                                |
| Safety and Preliminary Efficacy of Activated Recombinant Human Factor VII in Acute Intracerebral Haemorrhage                                      | NCT01566786    | 2     | Biological: recombinant activated factor VII       | Haematoma expansion  | Completed, pending results                                                                                                                                                                |
| “Spot Sign” Selection of Intracerebral Hemorrhage to Guide Hemostatic Therapy (SPOTLIGHT)                                                         | NCT01359202    | 2     | Biological: recombinant activated factor VII       | Haematoma expansion  | No difference in haematoma growth (2.6 vs. 2.5 mL) at 24 hours, favourable functional outcome mRS 0-3 (32% vs. 37%), or mortality (21% vs. 20%) at 90 days <sup>10</sup>                  |
| The Spot Sign for Predicting and Treating ICH Growth Study (STOP-IT)                                                                              | NCT00810888    | 2     | Biological: recombinant activated factor VII       | Haematoma expansion  |                                                                                                                                                                                           |
| Clinical Study on the Treatment of Hypertensive Intracerebral Hemorrhage With Panax Notoginseng Saponin (CSTHHPNS)                                | NCT02999048    | 4     | Drug: Panax notoginseng saponins                   | Haematoma expansion  | Completed, pending results                                                                                                                                                                |
| Surgical trial in lobar intracerebral hemorrhage (STICH II)                                                                                       | ISRCTN22153967 | N/A   | Surgical: craniotomy                               | Haematoma evacuation | No difference in mortality (24% vs. 18%) or favourable functional outcome GOSE (38% vs. 41%) at 6-months <sup>11</sup>                                                                    |

| Study title (as listed in clinicaltrials.gov)                                                                                                       | Identifier          | Phase | Intervention                                                                            | Target               | Outcome (control vs. intervention)                                                                                                                                                                                                                                                                   |
|-----------------------------------------------------------------------------------------------------------------------------------------------------|---------------------|-------|-----------------------------------------------------------------------------------------|----------------------|------------------------------------------------------------------------------------------------------------------------------------------------------------------------------------------------------------------------------------------------------------------------------------------------------|
| Decompressive Hemicraniectomy in Intracerebral Hemorrhage (SWITCH)                                                                                  | NCT02258919         | N/A   | Surgical: decompressive craniectomy                                                     | Haematoma evacuation | Recruiting                                                                                                                                                                                                                                                                                           |
| Minimally invasive stereotactic puncture and thrombolysis therapy versus conventional craniotomy in the treatment of acute intracerebral hemorrhage | ACTRN12610000945022 | N/A   | Procedure: minimally invasive stereotactic puncture and thrombolysis therapy            | Haematoma evacuation | Improved functional outcome (mRS 3.9 vs. 2.2), no difference in mortality (24% vs. 19%) at 365 days <sup>12</sup>                                                                                                                                                                                    |
| The Minimally Invasive Endoscopic Surgery With the Axonpen System for Spontaneous Intracerebral Hemorrhage (MIECH)                                  | NCT04839770         | N/A   | Device: Axonpen system                                                                  | Haematoma evacuation | Recruiting                                                                                                                                                                                                                                                                                           |
| Minimally invasive craniopuncture combined with urokinase infusion therapy                                                                          | N/A                 | N/A   | Surgical: minimally invasive craniopuncture therapy, Drug: urokinase                    | Haematoma evacuation | No difference in functional outcome mRS 0-3 (19% vs. 14%) at 14 days, decreased mortality (25% vs. 15%) at 90 days <sup>13</sup>                                                                                                                                                                     |
| Minimally Invasive Surgery and rtPA for Intracerebral Hemorrhage Evacuation (MISTIE)                                                                | NCT00224770         | 2     | Surgical: minimally invasive surgery, Biological: rt-PA                                 | Haematoma evacuation | No difference in favourable outcome mRS 0-3 (19% vs. 32%) and mortality (35.5% vs. 40%) at 365 days <sup>14</sup>                                                                                                                                                                                    |
| Minimally invasive surgery plus rt-PA for ICH evacuation phase III (MISTIE-III)                                                                     | NCT01827046         | 3     | Surgical: minimally invasive surgery, Biological: rt-PA                                 | Haematoma evacuation | No difference in favourable functional outcome mRS 0-3 at 12-months for moderate to large ICH (42% vs. 44%), reduced mortality (26% vs. 19%), <sup>15</sup> patients with $\leq 15$ mL end of treatment ICH volume or $\geq 70\%$ volume reduction with favourable functional outcomes <sup>16</sup> |
| Minimally-invasive Surgery Versus Craniotomy in Patients With Supratentorial Hypertensive Intracerebral Hemorrhage (MISICH)                         | NCT02811614         | N/A   | Surgical: minimally invasive surgery (endoscopic evacuation or stereotactic aspiration) | Haematoma evacuation | Recruiting                                                                                                                                                                                                                                                                                           |
| Early Minimally-invasive Removal of Intracerebral Hemorrhage (ICH) (ENRICH)                                                                         | NCT02880878         | N/A   | Surgical: minimally invasive parafascicular surgery                                     | Haematoma evacuation | Recruiting                                                                                                                                                                                                                                                                                           |
| Dutch Intracerebral Hemorrhage Surgery Trial Pilot Study (DIST pilot)                                                                               | NCT03608423         | 2     | Surgical: minimally-invasive endoscopy-guided surgery                                   | Haematoma evacuation | Active, not recruiting                                                                                                                                                                                                                                                                               |
| Early Minimally Invasive Image Guided Endoscopic Evacuation of Intracerebral Haemorrhage                                                            | NCT04805177         | Pilot | Surgical: minimally invasive image-guided endoscopic hematoma evacuation                | Haematoma evacuation | Recruiting                                                                                                                                                                                                                                                                                           |
| INVEST Feasibility – Minimally Invasive Endoscopic Surgery With Apollo in Patients With Brain Hemorrhage                                            | NCT02654015         |       | Surgical: Apollo minimally invasive surgery                                             | Haematoma evacuation | Recruiting                                                                                                                                                                                                                                                                                           |
| Artemis in the Removal of Intracerebral Hemorrhage (MIND)                                                                                           | NCT03342664         |       | Surgical: Artemis minimally invasive surgery                                            | Haematoma evacuation | Recruiting                                                                                                                                                                                                                                                                                           |
| The MIRROR Registry: Minimally Invasive Intracerebral Hemorrhage Evacuation (MIRROR)                                                                | NCT04494295         |       | Surgical: Aurora Surgiscope System minimally invasive surgery                           | Haematoma evacuation | Recruiting                                                                                                                                                                                                                                                                                           |

| Study title (as listed in clinicaltrials.gov)                                                                           | Identifier  | Phase | Intervention                                                                                       | Target                                             | Outcome (control vs. intervention)                                                                        |
|-------------------------------------------------------------------------------------------------------------------------|-------------|-------|----------------------------------------------------------------------------------------------------|----------------------------------------------------|-----------------------------------------------------------------------------------------------------------|
| Ultra-Early, Minimally Invasive IntraCerebral Haemorrhage Evacuation Versus Standard Treatment (EVACUATE)               | NCT04434807 | N/A   | Surgical: minimally invasive hematoma evacuation                                                   | Haematoma evacuation                               | Recruiting                                                                                                |
| Minimal Invasive Surgical Intracerebral Hemorrhage Removal (HEALME)                                                     | NCT05138341 | N/A   | Surgical: minimally invasive hematoma evacuation                                                   | Haematoma evacuation                               | Not yet recruiting                                                                                        |
| Safety and Efficacy of Stereotactic Aspiration Plus Urokinase in Deep Intracerebral Hemorrhage Evacuation (STAPLE-dICH) | NCT04686877 | 2/3   | Procedure: stereotactic aspiration plus urokinase irrigation (STAPLE)                              | Haematoma evacuation                               | Recruiting                                                                                                |
| Robotic Assisted Evacuation of Sub-acute and Chronic Hypertensive Cerebral Hemorrhage                                   | NCT04957862 | N/A   | Procedure: robotic assisted evacuation                                                             | Haematoma evacuation                               | Not yet recruiting                                                                                        |
| Active Removal of IntraCerebral Hematoma Via Active Irrigation (ARCH)                                                   | NCT05118997 | N/A   | Procedure: IRRFlow with manual rt-PA administration followed by Active Fluid Exchange              | Haematoma evacuation                               | Recruiting                                                                                                |
| Acute Hypertensive Cerebral Hemorrhage Surgery (NET-OCEAN)                                                              | NCT04957849 | N/A   | Procedure: neuroendoscopic, trans-occipital approach combined with low-drainage surgery            | Haematoma evacuation                               | Not yet recruiting                                                                                        |
| Stereotactic Operation Integrating With Thrombolysis in Basal Ganglion Hemorrhage Evacuation (SOITBE)                   | NCT03957707 | N/A   | Surgical: minimally invasive puncture aspiration plus rt-PA                                        | Haematoma evacuation                               | Recruiting                                                                                                |
| Stereotactic Operation Integrating With Thrombolysis in Basal Ganglion Hemorrhage Evacuation II (SOITBE II)             | NCT04172376 | N/A   | Surgical: minimally invasive puncture aspiration plus rt-PA                                        | Haematoma evacuation                               | Not yet recruiting                                                                                        |
| Intracavitary Injection of hUMSCs in Acute Basal Ganglia Hematoma After Stereotactic Aspiration                         | NCT04074408 | 2     | Surgical: stereotactic aspiration surgery, Biological: human umbilical cord mesenchymal stem cells | Haematoma evacuation, stem cell transplantation    | Recruiting                                                                                                |
| Use of Minocycline in Intracerebral Hemorrhage                                                                          | NCT03040128 | 1/2   | Drug: minocycline                                                                                  | White matter injury, inflammation                  | Decreased MMP-9 levels, no difference in 90-days mRS (1 vs. 1) <sup>17</sup>                              |
| A Pilot Study of Minocycline in Intracerebral Hemorrhage Patients (MACH)                                                | NCT01805895 | 1/2   | Drug: minocycline                                                                                  | White matter injury, inflammation                  | No difference in MMP-9 and interleukin 6 levels, no difference in 90-days mRS (3.7 vs. 3.5) <sup>18</sup> |
| Fingolimod as a Treatment of Cerebral Edema After Intracerebral Hemorrhage (FITCH)                                      | NCT04088630 | 1     | Drug: fingolimod                                                                                   | White matter injury, immunosuppression             | Recruiting                                                                                                |
| Prevention of Hypertensive Injury to the Brain by Intensive Treatment in IntraCerebral Haemorrhage (PROHIBIT-ICH)       | NCT03863665 |       | Device: telemetric blood pressure monitoring                                                       | White matter injury, post-ICH cognitive impairment | Recruiting                                                                                                |

| Study title (as listed in clinicaltrials.gov)                                                               | Identifier  | Phase | Intervention                                                      | Target                                             | Outcome (control vs. intervention)                                                                                                                                                                                                   |
|-------------------------------------------------------------------------------------------------------------|-------------|-------|-------------------------------------------------------------------|----------------------------------------------------|--------------------------------------------------------------------------------------------------------------------------------------------------------------------------------------------------------------------------------------|
| Intracerebral Hemorrhage Deferoxamine Trial (iDEF)                                                          | NCT02175225 | 2     | Drug: deferoxamine mesylate                                       | Iron toxicity, ferroptosis                         | Improved mRS 0-2 (36 vs. 45) and mRS 0-3 (68% vs. 72%), no difference in mortality (9% vs. 9%) at 180 days, <sup>19</sup> favourable outcome (mRS 0-2) for moderate hematoma volume (10-30 mL, 26% vs. 50%) at 90 days <sup>20</sup> |
| Clinical Study of Huperzine A in the Treatment of Patients With Hypertensive Cerebral Hemorrhage            | NCT04509323 | 4     | Drug: huperzine A                                                 | Cell death                                         | Not yet recruiting                                                                                                                                                                                                                   |
| Edaravone Dexborneol for Treatment of Hypertensive Intracerebral Hemorrhage (ED-ICH)                        | NCT04714177 | 2     | Drug: edaravone dexborneol                                        | Cell death, neuroinflammation                      | Not yet recruiting                                                                                                                                                                                                                   |
| Feasibility Study of Transcranial Ultrasound Stimulation (TUS) on Stroke Patients                           | NCT04877184 | N/A   | Procedure: transcranial ultrasound stimulation and rehabilitation | Cell death, neuroinflammation, blood-brain barrier | Recruiting                                                                                                                                                                                                                           |
| Feasibility of Improving Cerebral Autoregulation in Acute Intracerebral Haemorrhage (BREATHE-ICH)           | NCT03324321 | N/A   | Other: hypocapnia via hyperventilation protocol                   | Cerebral autoregulation                            | Improved autoregulatory index (4.8 pre-, 7.0 post-intervention) <sup>21</sup>                                                                                                                                                        |
| Glibenclamide Advantage in Treating Edema After Intracerebral Hemorrhage (GATE-ICH)                         | NCT03741530 | N/A   | Drug: glibenclamide                                               | Perihaematomal oedema                              | Completed, pending results                                                                                                                                                                                                           |
| Dimethyl Fumarate for the Treatment of Intracerebral Hemorrhage                                             | NCT04890379 | 2     | Drug: dimethyl fumarate                                           | Perihaematomal oedema                              | Not yet recruiting                                                                                                                                                                                                                   |
| Conivaptan for the Reduction of Cerebral Edema in Intracerebral Hemorrhage- A Safety and Tolerability Study | NCT03000283 | 1     | Drug: Conivaptan                                                  | Perihaematomal oedema                              | Safe and tolerable <sup>22</sup>                                                                                                                                                                                                     |
| Administration of Celecoxib for Treatment of Intracerebral Hemorrhage: A Pilot Study (ACE-ICH)              | NCT00526214 | Pilot | Drug: celecoxib medication                                        | Perihaematomal oedema, hematoma expansion          | Reduced expansion of perihematoma oedema (91% vs. 44%) and hematoma (49% vs. 2%), improved functional outcome mRS 0-2 (38% vs. 60%) <sup>23</sup>                                                                                    |
| Remote Ischemic Conditioning for Intracerebral Hemorrhage (RICH)                                            | NCT03930940 | 1     | Procedure: remote ischaemic conditioning                          | Perihaematomal oedema, hematoma resolution         | Increased haematoma resolution (42% vs. 49%) and relative perihematoma edema (2.02 vs. 1.77) at 7 days, no difference in favourable outcome mRS 0-3 (60% vs. 65%) <sup>24</sup>                                                      |
| Remote Ischemic Conditioning for the Treatment of Intracerebral Hemorrhage (RICH-2)                         | NCT04657133 | 3     | Procedure: remote ischaemic conditioning                          | Perihaematomal oedema, hematoma resolution         | Recruiting                                                                                                                                                                                                                           |
| Remote Ischemic Conditioning for Cerebral Amyloid Angiopathy-related Intracerebral Hemorrhage (RIC-CAAH)    | NCT04757597 | N/A   | Procedure: remote ischaemic conditioning                          | Perihaematomal oedema, hematoma resolution         | Recruiting                                                                                                                                                                                                                           |
| Remote Ischemic Conditioning in Patients With Acute Stroke (RESIST)                                         | NCT03481777 | N/A   | Procedure: remote ischaemic conditioning                          | Perihaematomal oedema, hematoma resolution         | Recruiting                                                                                                                                                                                                                           |

| Study title (as listed in clinicaltrials.gov)                                                                          | Identifier  | Phase | Intervention                                                                                | Target                                                        | Outcome (control vs. intervention)                                          |
|------------------------------------------------------------------------------------------------------------------------|-------------|-------|---------------------------------------------------------------------------------------------|---------------------------------------------------------------|-----------------------------------------------------------------------------|
| Safety and Efficacy of Remote Ischemic Conditioning in Patients With Spontaneous Intracerebral Hemorrhage (SERIC-sICH) | NCT03484936 | N/A   | Procedure: remote ischaemic conditioning                                                    | Perihaematomal oedema, haematoma resolution                   | Not yet recruiting                                                          |
| Statin for Neuroprotection in Spontaneous Intracerebral Hemorrhage (STATIC)                                            | NCT04857632 | 2/3   | Drug: statin                                                                                | Perihaematomal oedema, neuroinflammation                      | Recruiting                                                                  |
| Statins In Intracerebral Hemorrhage (SATURN)                                                                           | NCT03936361 | 3     | Drug: statin                                                                                | Perihaematomal oedema, neuroinflammation                      | Recruiting                                                                  |
| Systemic Normothermia in Intracerebral Hemorrhage (ICH) (SNICH)                                                        | NCT02078037 | 1     | Device: Arctic Sun cooling device                                                           | Perihaematomal oedema, neuroinflammation                      | Completed, pending results                                                  |
| Biomarker and Edema Attenuation in IntraCerebral Hemorrhage (BEACH)                                                    | NCT05020535 | 2     | Drug: MW01-6-189WH                                                                          | Perihaematomal oedema, neuroinflammation                      | Not yet recruiting                                                          |
| Chinese Herbal Medicine in Acute INtracerebral Haemorrhage (CHAIN)                                                     | NCT05066620 | 3     | Drug: Chinese herbal medicine FYTF-919                                                      | Perihaematomal oedema, neuroinflammation                      | Not yet recruiting                                                          |
| Studying Anakinra to Reduce Secondary Brain Damage After Spontaneous Haemorrhagic Stroke (ACTION)                      | NCT04834388 | 2     | Drug: interleukin 1 receptor antagonist Anakinra                                            | Perihaematomal oedema, neuroinflammation, blood-brain barrier | Not yet recruiting                                                          |
| Interleukin-1 Receptor Antagonist in Intracerebral Haemorrhage (BLOC-ICH)                                              | NCT03737344 | 2     | Drug: interleukin 1 receptor antagonist Kineret                                             | Perihaematomal oedema, neuroinflammation, blood-brain barrier | Completed, pending results                                                  |
| Safety of Pioglitazone for Hematoma Resolution In Intracerebral Hemorrhage (SHRINC)                                    | NCT00827892 | 2     | Drug: pioglitazone                                                                          | Microglia, hematoma resolution                                | Completed, pending results                                                  |
| Efficacy, Safety and Tolerability of BAF312 Compared to Placebo in Patients With Intracerebral Hemorrhage (ICH)        | NCT03338998 | 2     | Drug: BAF312 (Siponimod, a selective modulator of sphingosine 1-phosphate receptor 1 and 5) | Neuroinflammation                                             | Completed, pending results                                                  |
| A Proof of Concept Study to Evaluate CN-105 in ICH Patients (CATCH)                                                    | NCT03168581 | 2     | Drug: CN-105                                                                                | Neuroinflammation                                             | Improved functional recovery mRS 0-3 (18% vs. 40%) at 30 days <sup>25</sup> |
| Evaluation of CN-105 in Subject With Acute Supratentorial Intracerebral Hemorrhage (S-CATCH)                           | NCT03711903 | 2     | Drug: CN-105                                                                                | Neuroinflammation                                             | Recruiting                                                                  |



| Study title (as listed in clinicaltrials.gov)                                                                               | Identifier                         | Phase | Intervention                                                       | Target                          | Outcome (control vs. intervention)                                                                                                                                     |
|-----------------------------------------------------------------------------------------------------------------------------|------------------------------------|-------|--------------------------------------------------------------------|---------------------------------|------------------------------------------------------------------------------------------------------------------------------------------------------------------------|
| Mesenchymal Stem Cells Therapy in Patients With Recent Intracerebral Hemorrhage                                             | NCT03371329                        | 1     | Biological: mesenchymal stem cells                                 | Neuroinflammation, regeneration | Completed, pending results                                                                                                                                             |
| Clinical Evaluation of Removing Blood Stasis Therapy in Treating Acute Cerebral Hemorrhage Safety and Efficacy (CERBSTTSCH) | NCT03354026                        | 4     | Drug: traditional Chinese medicine (AICH-PXZY)                     | Gut microbiota                  | Not yet recruiting                                                                                                                                                     |
| Life After Stroke - the LAST Study (LAST)                                                                                   | NCT01467206                        | N/A   | Behavioural: Long-term follow up by a coordinating physiotherapist | Post-ICH motor recovery         | No benefit on motor assessment or mRS (1.33 vs. 1.28) at 18 months <sup>26</sup>                                                                                       |
| A Very Early Rehabilitation Trial (AVERT)                                                                                   | ACTRN12606000185561<br>NCT01846247 | 3     | Procedure: very early mobilization vs. early mobilization          | Post-ICH motor recovery         | Poor functional outcome for very early mobilization (OR 0.48 favours early mobilization) and death (OR 3.21 favours early mobilization) at 3 months <sup>27</sup>      |
| Akershus Early Mobilisation in Stroke Study (AKEMIS)                                                                        | NCT00832351                        | 3     | Procedure: mobilization                                            | Post-ICH motor recovery         | Completed, pending results                                                                                                                                             |
| Clinical Curative Effect and safe Research on treatment of hemorrhagic stroke with stage acupuncture                        | ChiCTR-TRC-08000225                | N/A   | Procedure: acupuncture                                             | Post-ICH motor recovery         | Improved lower limb function Fugl-Mayer (7 vs. 13 points difference from baseline), but not lower limb function (20 vs. 20 points difference) at 90 days <sup>28</sup> |
| Can Acupuncture Benefit Surgical Patients With Haemorrhagic Stroke?                                                         | NCT01037894                        | 1/2   | Procedure: acupuncture                                             | Post-ICH motor recovery         | Completed, pending results                                                                                                                                             |
| Biologic Mechanisms of Early Exercise After Intracerebral Hemorrhage (BEACH)                                                | NCT04027049                        | N/A   | Device: Supine cycle ergometry of the lower extremities            | Post-ICH motor recovery         | Recruiting                                                                                                                                                             |
| Seizures Post Intracerebral Hemorrhage                                                                                      | NCT01115959                        | 4     | Drug: valproic acid                                                | Post-ICH seizures               | Completed, pending results                                                                                                                                             |
| Effects of fluoxetine on functional outcomes after acute stroke (FOCUS)                                                     | ISRCTN83290762                     | N/A   | Drug: fluoxetine                                                   | Post-ICH depression             | No subgroup analysis for the haemorrhagic stroke patients only <sup>29</sup>                                                                                           |
| Assessment of Fluoxetine in Stroke recovery (AFFINITY)                                                                      | ACTRN12611000774921                | 3     | Drug: fluoxetine                                                   | Post-ICH depression             | No difference in shifts in mRS (OR 0.905) <sup>30</sup>                                                                                                                |
| Safety and efficacy of fluoxetine on functional recovery after acute stroke (EFFECTS)                                       | NCT02683213                        | N/A   | Drug: fluoxetine                                                   | Post-ICH depression             | No subgroup analysis for the haemorrhagic stroke patients only <sup>31</sup>                                                                                           |

## References

1. Bai Y, Deng H, Shantsila A, Lip GY. Rivaroxaban Versus Dabigatran or Warfarin in Real-World Studies of Stroke Prevention in Atrial Fibrillation: Systematic Review and Meta-Analysis. *Stroke*. 2017;48(4):970-6.
2. Schreuder F, van Nieuwenhuizen KM, Hofmeijer J, Vermeer SE, Kerkhoff H, Zock E, et al. Apixaban versus no anticoagulation after anticoagulation-associated intracerebral haemorrhage in patients with atrial fibrillation in the Netherlands (APACHE-AF): a randomised, open-label, phase 2 trial. *The Lancet Neurology*. 2021;20(11):907-16.
3. Naidech AM, Maas MB, Levasseur-Franklin KE, Liotta EM, Guth JC, Berman M, et al. Desmopressin improves platelet activity in acute intracerebral hemorrhage. *Stroke*. 2014;45(8):2451-3.
4. Qureshi AI, Palesch YY, Barsan WG, Hanley DF, Hsu CY, Martin RL, et al. Intensive Blood-Pressure Lowering in Patients with Acute Cerebral Hemorrhage. *The New England journal of medicine*. 2016;375(11):1033-43.
5. Anderson CS, Heeley E, Huang Y, Wang J, Stapf C, Delcourt C, et al. Rapid blood-pressure lowering in patients with acute intracerebral hemorrhage. *The New England journal of medicine*. 2013;368(25):2355-65.
6. Butcher KS, Jeerakathil T, Hill M, Demchuk AM, Dowlathshahi D, Coutts SB, et al. The Intracerebral Hemorrhage Acutely Decreasing Arterial Pressure Trial. *Stroke*. 2013;44(3):620-6.
7. Graffagnino C, Bergese S, Love J, Schneider D, Lazaridis C, LaPointe M, et al. Clevidipine rapidly and safely reduces blood pressure in acute intracerebral hemorrhage: the ACCELERATE trial. *Cerebrovascular diseases*. 2013;36(3):173-80.
8. Sprigg N, Flaherty K, Appleton JP, Al-Shahi Salman R, Bereczki D, Beridze M, et al. Tranexamic acid for hyperacute primary IntraCerebral Haemorrhage (TICH-2): an international randomised, placebo-controlled, phase 3 superiority trial. *Lancet*. 2018;391(10135):2107-15.
9. Meretoja A, Yassi N, Wu TY, Churilov L, Sibolt G, Jeng JS, et al. Tranexamic acid in patients with intracerebral haemorrhage (STOP-AUST): a multicentre, randomised, placebo-controlled, phase 2 trial. *The Lancet Neurology*. 2020;19(12):980-7.
10. Gladstone DJ, Aviv RI, Demchuk AM, Hill MD, Thorpe KE, Khoury JC, et al. Effect of Recombinant Activated Coagulation Factor VII on Hemorrhage Expansion Among Patients With Spot Sign-Positive Acute Intracerebral Hemorrhage: The SPOTLIGHT and STOP-IT Randomized Clinical Trials. *JAMA neurology*. 2019;76(12):1493-501.
11. Mendelow AD, Gregson BA, Rowan EN, Murray GD, Gholkar A, Mitchell PM, et al. Early surgery versus initial conservative treatment in patients with spontaneous supratentorial lobar intracerebral haematomas (STICH II): a randomised trial. *Lancet*. 2013;382(9890):397-408.
12. Zhou H, Zhang Y, Liu L, Han X, Tao Y, Tang Y, et al. A prospective controlled study: minimally invasive stereotactic puncture therapy versus conventional craniotomy in the treatment of acute intracerebral hemorrhage. *BMC neurology*. 2011;11:76.
13. Sun H, Liu H, Li D, Liu L, Yang J, Wang W. An effective treatment for cerebral hemorrhage: minimally invasive craniopuncture combined with urokinase infusion therapy. *Neurological research*. 2010;32(4):371-7.
14. Hanley DF, Thompson RE, Muschelli J, Rosenblum M, McBee N, Lane K, et al. Safety and efficacy of minimally invasive surgery plus alteplase in intracerebral haemorrhage evacuation (MISTIE): a randomised, controlled, open-label, phase 2 trial. *The Lancet Neurology*. 2016;15(12):1228-37.
15. Hanley DF, Thompson RE, Rosenblum M, Yenokyan G, Lane K, McBee N, et al. Efficacy and safety of minimally invasive surgery with thrombolysis in intracerebral haemorrhage evacuation (MISTIE III): a randomised, controlled, open-label, blinded endpoint phase 3 trial. *Lancet*. 2019;393(10175):1021-32.
16. Awad IA, Polster SP, Carrion-Penagos J, Thompson RE, Cao Y, Stadnik A, et al. Surgical Performance Determines Functional Outcome Benefit in the Minimally Invasive Surgery Plus Recombinant Tissue Plasminogen Activator for Intracerebral Hemorrhage Evacuation (MISTIE) Procedure. *Neurosurgery*. 2019;84(6):1157-68.
17. Chang JJ, Kim-Tenser M, Emanuel BA, Jones GM, Chapple K, Alikhani A, et al. Minocycline and matrix metalloproteinase inhibition in acute intracerebral hemorrhage: a pilot study. *European journal of neurology*. 2017;24(11):1384-91.
18. Fouda AY, Newsome AS, Spellacy S, Waller JL, Zhi W, Hess DC, et al. Minocycline in Acute Cerebral Hemorrhage: An Early Phase Randomized Trial. *Stroke*. 2017;48(10):2885-7.
19. Selim M, Foster LD, Moy CS, Xi G, Hill MD, Morgenstern LB, et al. Deferoxamine mesylate in patients with intracerebral haemorrhage (i-DEF): a multicentre, randomised, placebo-controlled, double-blind phase 2 trial. *The Lancet Neurology*. 2019;18(5):428-38.
20. Wei C, Wang J, Foster LD, Yeatts SD, Moy C, Mocco J, et al. Effect of Deferoxamine on Outcome According to Baseline Hematoma Volume: A Post Hoc Analysis of the i-DEF Trial. *Stroke*. 2021:STROKEAHA121035421.

21. Minhas JS, Panerai RB, Swienton D, Robinson TG. Feasibility of improving cerebral autoregulation in acute intracerebral hemorrhage (BREATHE-ICH) study: Results from an experimental interventional study. *International journal of stroke : official journal of the International Stroke Society*. 2020;15(6):627-37.
22. Corry JJ, Asaithambi G, Shaik AM, Lassig JP, Marino EH, Ho BM, et al. Conivaptan for the Reduction of Cerebral Edema in Intracerebral Hemorrhage: A Safety and Tolerability Study. *Clinical drug investigation*. 2020;40(5):503-9.
23. Lee SH, Park HK, Ryu WS, Lee JS, Bae HJ, Han MK, et al. Effects of celecoxib on hematoma and edema volumes in primary intracerebral hemorrhage: a multicenter randomized controlled trial. *European journal of neurology*. 2013;20(8):1161-9.
24. Zhao W, Jiang F, Li S, Liu G, Wu C, Wang Y, et al. Safety and efficacy of remote ischemic conditioning for the treatment of intracerebral hemorrhage: A proof-of-concept randomized controlled trial. *International journal of stroke : official journal of the International Stroke Society*. 2021:17474930211006580.
25. James ML, Troy J, Nowacki N, Komisarow J, Swisher CB, Tucker K, et al. CN-105 in Participants with Acute Supratentorial Intracerebral Hemorrhage (CATCH) Trial. *Neurocritical care*. 2021.
26. Askim T, Langhammer B, Ihle-Hansen H, Gunnes M, Lydersen S, Indredavik B, et al. Efficacy and Safety of Individualized Coaching After Stroke: the LAST Study (Life After Stroke): A Pragmatic Randomized Controlled Trial. *Stroke*. 2018;49(2):426-32.
27. Langhorne P, Wu O, Rodgers H, Ashburn A, Bernhardt J. A Very Early Rehabilitation Trial after stroke (AVERT): a Phase III, multicentre, randomised controlled trial. *Health technology assessment*. 2017;21(54):1-120.
28. Wang HQ, Hou M, Li H, Bao CL, Min L, Dong GR, et al. Effects of acupuncture treatment on motor function in patients with subacute hemorrhagic stroke: A randomized controlled study. *Complementary therapies in medicine*. 2020;49:102296.
29. Collaboration FT. Effects of fluoxetine on functional outcomes after acute stroke (FOCUS): a pragmatic, double-blind, randomised, controlled trial. *Lancet*. 2019;393(10168):265-74.
30. Collaboration AT. Safety and efficacy of fluoxetine on functional outcome after acute stroke (AFFINITY): a randomised, double-blind, placebo-controlled trial. *The Lancet Neurology*. 2020;19(8):651-60.
31. Collaboration ET. Safety and efficacy of fluoxetine on functional recovery after acute stroke (EFFECTS): a randomised, double-blind, placebo-controlled trial. *The Lancet Neurology*. 2020;19(8):661-9.
